# Supplementary material for: Single-molecule magnet behavior in 2,2’-bipyrimidine-bridged dilanthanide complexes
Source: publisher site journal article supplement (doi:10.3762/bjnano.7.15), 2016-01-28
Supplement: Additional file 1 [file 2190-4286-7-15-S1.pdf]

# Supporting Information

for

## Single-molecule magnet behavior in 2,2'-bipyrimidine-bridged dilanthanide complexes

Wen Yu<sup>1\*</sup>, Frank Schramm<sup>1</sup>, Eufemio Moreno Pineda<sup>1</sup>, Yanhua Lan<sup>2</sup>, Olaf Fuhr<sup>1</sup>, Jinjie Chen<sup>3</sup>, Hironari Isshiki<sup>3</sup>, Wolfgang Wernsdorfer<sup>2</sup>, Wulf Wulfhekel<sup>3</sup>, and Mario Ruben<sup>1,4\*</sup>

Address: <sup>1</sup>Institute of Nanotechnology (INT), Karlsruhe Institute of Technology (KIT), Hermann-von-Helmholtz-Platz 1, D-76344 Eggenstein-Leopoldshafen, Germany, <sup>2</sup>Université Grenoble Alpes / CNRS, Institut NEEL, 25 rue des Martyrs, F-38000 Grenoble, France, <sup>3</sup>Physikalisches Institut (PI), Karlsruhe Institute of Technology (KIT), Wolfgang-Gaede-Str. 1, D-76131 Karlsruhe, Germany, and <sup>4</sup>Institut de Physique et Chimie des Matériaux de Strasbourg (IPCMS), CNRS-Université de Strasbourg, 23 rue du Loess, BP 43, F-67034 Strasbourg Cedex 2, France

Email: WenYu - wen.yu@kit.edu; Mario Ruben - mario.ruben@kit.edu

\* Corresponding author

# Additional Experimental Information

## Contents

|                                                                                                                                                                                                     |    |
|-----------------------------------------------------------------------------------------------------------------------------------------------------------------------------------------------------|----|
| Table S1: Sublimation points, the chemical shift $\delta$ and IR spectra peaks of 1–5.                                                                                                              | 3  |
| Table S2: Selected bond lengths [Å] and angles [°] for 1–5.                                                                                                                                         | 4  |
| Table S3: Continuous shaped measures (CShM) for $\{\text{Ln}_2\}$ obtained using SHAPE.                                                                                                             | 5  |
| Figure S1: Views of the coordination polyhedra surrounding the lanthanide ions. Color code used: grey for bipyrimidine ligand, green, pink, orange and dark blue for the respective tmhd ligands.   | 6  |
| Figure S2: $\chi_M'(v)$ , $\chi_M''(v)$ and $\chi_M'T(v)$ for 3 at zero DC field. Solid lines represent the fittings.                                                                               | 7  |
| Figure S3: $\chi_M''(v)$ for compound 5 at 2 K from 0 to 5 kG (solid lines are guide for the eye).                                                                                                  | 8  |
| Figure S4: Hysteresis loops observed in the $M_\beta$ as a function of applied magnetic field ( $H$ ).                                                                                              | 8  |
| Figure S5: Magnetization vs. field on a single crystal of $\text{Tb}_2$ complex 2 at 0.03 K with different field sweep rates (left) and at a 0.07 T/s sweep rate in the 0.03–5 K temperature range. | 9  |
| Figure S6: Magnetization vs field on a single crystal of $\text{Er}_2$ complex 5 at 0.03 K with different field sweep rates (left) and at a 0.14 T/s sweep rate in the 0.03–5 K temperature range.  | 10 |

**Table S1:** Sublimation points, the chemical shift  $\delta$  and IR spectra peaks of **1–5**.

| Formula                                           | Sublimation point / °C             | $^1\text{H NMR}$ (500 MHz, $\text{CDCl}_3$ , 298 K) $\delta$ / ppm |                  |                    |              | IR (KBr disk) / $\text{cm}^{-1}$ |                          |                   |
|---------------------------------------------------|------------------------------------|--------------------------------------------------------------------|------------------|--------------------|--------------|----------------------------------|--------------------------|-------------------|
|                                                   |                                    | H-1                                                                | H-2              | Methin             | <i>t</i> -Bu | $\nu(\text{C}=\text{O})$         | $\nu(\text{C}=\text{C})$ | $\nu(\text{bpm})$ |
| <b>1</b> $[\text{Gd}(\text{thmd})_3]_2\text{bpm}$ | 167<br>( $1 \cdot 10^{-3}$ mbar)   | <sup>a</sup>                                                       | <sup>a</sup>     | 1.30               | 1.18         | 1576                             | 1507                     | 1420              |
| <b>2</b> $[\text{Tb}(\text{thmd})_3]_2\text{bpm}$ | 188<br>( $6 \cdot 10^{-2}$ mbar)   | 16.19 -<br>15.20                                                   | 6.56 -<br>5.75   | -0.74              | 1.20         | 1576                             | 1507                     | 1420              |
| <b>3</b> $[\text{Dy}(\text{thmd})_3]_2\text{bpm}$ | 165<br>( $1 \cdot 10^{-3}$ mbar)   | 20.03                                                              | 6.00             | -2.77              | 1.17         | 1576                             | 1507                     | 1421              |
| <b>4</b> $[\text{Ho}(\text{thmd})_3]_2\text{bpm}$ | 180<br>( $2.5 \cdot 10^{-2}$ mbar) |                                                                    | <sup>b</sup>     |                    |              | 1576                             | 1507                     | 1424              |
| <b>5</b> $[\text{Er}(\text{thmd})_3]_2\text{bpm}$ | 160<br>( $4 \cdot 10^{-3}$ mbar)   | 40.32                                                              | 27.48 -<br>23.37 | -28.64 -<br>-30.99 | 1.16         | 1577                             | 1507                     | 1425              |

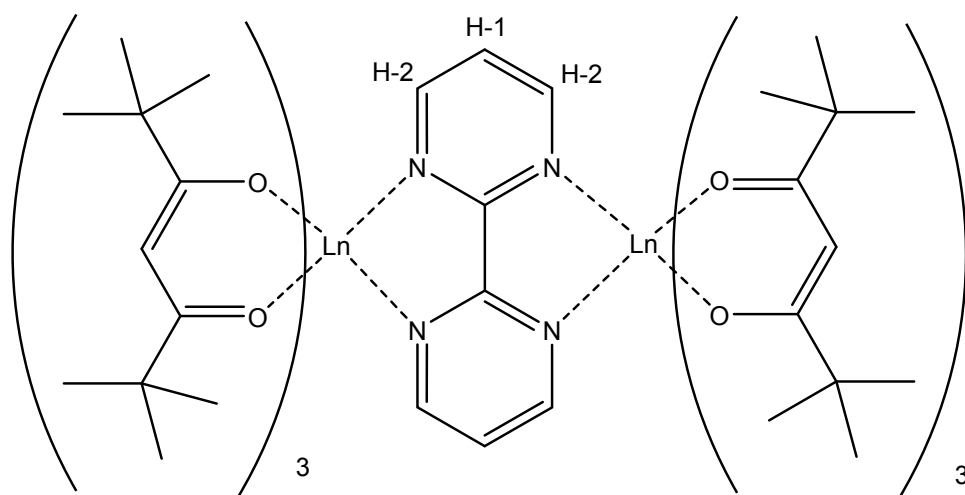

<sup>a</sup>These resonances are broadened beyond detection.

<sup>b</sup>The chemical shifts couldn't be detected.

**Table S2:** Selected bond lengths [Å] and angles [°] for 1–5.

| 1           | Distance / Å | 2         | Distance / Å | 3         | Distance / Å | 4           | Distance / Å | 5         | Distance / Å |
|-------------|--------------|-----------|--------------|-----------|--------------|-------------|--------------|-----------|--------------|
| Gd1-O1      | 2.363(3)     | Tb1-O1    | 2.337(2)     | Dy1-O1    | 2.330(2)     | Ho1-O1      | 2.326(3)     | Er1-O1    | 2.293(4)     |
| Gd1-O2      | 2.318(3)     | Tb1-O2    | 2.307(2)     | Dy1-O2    | 2.294(2)     | Ho1-O2      | 2.290(3)     | Er1-O2    | 2.280(4)     |
| Gd1-O3      | 2.277(3)     | Tb1-O3    | 2.343(2)     | Dy1-O3    | 2.296(2)     | Ho1-O3      | 2.244(4)     | Er1-O3    | 2.269(4)     |
| Gd1-O4      | 2.322(3)     | Tb1-O4    | 2.305(2)     | Dy1-O4    | 2.260(2)     | Ho1-O4      | 2.285(4)     | Er1-O4    | 2.241(4)     |
| Gd1-O5      | 2.321(3)     | Tb1-O5    | 2.265(2)     | Dy1-O5    | 2.293(2)     | Ho1-O5      | 2.288(4)     | Er1-O5    | 2.296(4)     |
| Gd1-O6      | 2.352(3)     | Tb1-O6    | 2.307(2)     | Dy1-O6    | 2.324(2)     | Ho1-O6      | 2.310(3)     | Er1-O6    | 2.292(4)     |
| Gd1-N1      | 2.631(4)     | Tb1-N1    | 2.599(2)     | Dy1-N1    | 2.581(2)     | Ho1-N1      | 2.593(4)     | Er1-N1    | 2.587(4)     |
| Gd1-N3      | 2.613(4)     | Tb1-N2    | 2.616(2)     | Dy1-N2    | 2.604(2)     | Ho1-N3      | 2.588(5)     | Er1-N2    | 2.578(4)     |
| Gd2-O7      | 2.344(3)     |           |              |           |              | Ho2-O7      | 2.302(3)     |           |              |
| Gd2-O8      | 2.326(3)     |           |              |           |              | Ho2-O8      | 2.288(3)     |           |              |
| Gd2-O9      | 2.285(3)     |           |              |           |              | Ho2-O9      | 2.252(4)     |           |              |
| Gd2-O10     | 2.331(3)     |           |              |           |              | Ho2-O10     | 2.301(4)     |           |              |
| Gd2-O11     | 2.321(3)     |           |              |           |              | Ho2-O11     | 2.284(4)     |           |              |
| Gd2-O12     | 2.349(3)     |           |              |           |              | Ho2-O12     | 2.308(3)     |           |              |
| Gd2-N2      | 2.631(4)     |           |              |           |              | Ho2-N2      | 2.590(5)     |           |              |
| Gd2-N4      | 2.657(4)     |           |              |           |              | Ho2-N4      | 2.618(4)     |           |              |
| 1           | Angles / °   | 2         | Angles / °   | 3         | Angles / °   | 4           | Angles / °   | 5         | Angles / °   |
| O1-Gd1-O2   | 71.6(1)      | O1-Tb1-O2 | 72.70(5)     | O1-Dy1-O2 | 72.57(7)     | O1-Ho1-O2   | 72.6(1)      | O1-Er1-O2 | 73.2(1)      |
| O3-Gd1-O4   | 73.0(1)      | O3-Tb1-O4 | 72.20(5)     | O3-Dy1-O4 | 74.13(7)     | O3-Ho1-O4   | 73.9(1)      | O3-Er1-O4 | 74.4(1)      |
| O5-Gd1-O6   | 72.4(1)      | O5-Tb1-O6 | 73.76(6)     | O5-Dy1-O6 | 72.95(7)     | O5-Ho1-O6   | 73.5(1)      | O5-Er1-O6 | 72.9(1)      |
| N1-Gd1-N3   | 61.7(1)      | N1-Tb1-N2 | 62.07(5)     | N1-Dy1-N2 | 62.37(7)     | N1-Ho1-N3   | 62.5(1)      | N1-Er1-N2 | 62.6(1)      |
| O7-Gd2-O8   | 71.9(1)      |           |              |           |              | O7-Ho2-O8   | 73.1(1)      |           |              |
| O9-Gd2-O10  | 73.2(1)      |           |              |           |              | O9-Ho2-O10  | 73.3(1)      |           |              |
| O11-Gd2-O12 | 72.2(1)      |           |              |           |              | O11-Ho2-O12 | 73.4(1)      |           |              |
| N2-Gd2-N4   | 61.0(1)      |           |              |           |              | N2-Ho2-N4   | 62.2(1)      |           |              |

**Table S3:** Continuous shaped measures (CShM) for  $\{\text{Ln}_2\}$  obtained using SHAPE.

| CShM     | Gd(1)  | Gd(2)  | Tb(1)  | Tb(2)  | Dy(1)  | Dy(2)  | Ho(1)  | Ho(2)  | Er(1)  | Er(2)  |
|----------|--------|--------|--------|--------|--------|--------|--------|--------|--------|--------|
| OP-8     | 35.832 | 30.374 | 30.219 | 30.219 | 30.205 | 30.205 | 30.263 | 30.151 | 29.855 | 46.201 |
| HPY-8    | 23.057 | 22.242 | 22.339 | 22.339 | 22.442 | 22.442 | 22.328 | 22.549 | 22.330 | 36.352 |
| HBPY-8   | 21.536 | 14.987 | 15.442 | 15.442 | 15.407 | 15.407 | 15.442 | 14.886 | 15.998 | 33.333 |
| CU-8     | 15.995 | 8.231  | 8.851  | 8.851  | 8.796  | 8.796  | 8.460  | 8.218  | 9.076  | 31.299 |
| SAPR-8   | 8.338  | 0.741  | 0.621  | 0.621  | 0.605  | 0.605  | 0.671  | 0.664  | 0.534  | 25.852 |
| TDD-8    | 9.822  | 2.341  | 2.407  | 2.407  | 2.375  | 2.375  | 2.180  | 2.361  | 2.331  | 27.145 |
| JGBF-8   | 19.999 | 15.997 | 16.085 | 16.085 | 16.138 | 16.138 | 16.572 | 15.786 | 16.555 | 33.117 |
| JETBPY-8 | 22.099 | 27.493 | 27.490 | 27.490 | 27.633 | 27.633 | 28.002 | 27.740 | 28.138 | 39.774 |

OP-8 = ( $D_{8h}$ ) Octagon

HPY-8 = ( $C_{7v}$ ) Heptagonal pyramid

HBPY-8 = ( $D_{6h}$ ) Hexagonal bipyramid

CU-8 = ( $O_h$ ) Cube

SAPR-8 = ( $D_{4d}$ ) Square antiprism

TDD-8 = ( $D_{2d}$ ) Triangular dodecahedron

JGBF-8 = ( $D_{2d}$ ) Johnson gyrobifastigium J26

JETBPY-8 = ( $D_{3h}$ ) Johnson elongated triangular bipyramid J14

JBTPR-8 = ( $C_{2v}$ ) Biaugmented trigonal prism J50

BTPR-8 = ( $C_{2v}$ ) Biaugmented trigonal pris

JSD-8 = ( $D_{2d}$ ) Snub diphenoid J84

TT-8 = ( $T_d$ ) Triakis tetrahedron

ETBPY-8 = ( $D_{3h}$ ) Elongated trigonal bipyramid

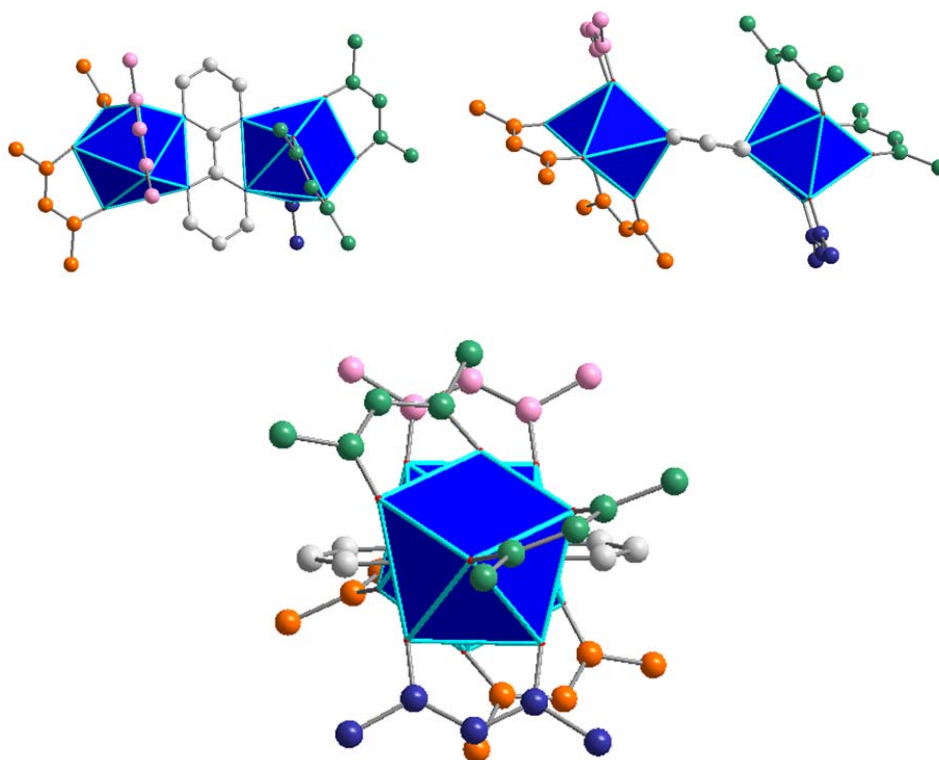

**Figure S1:** Views of the coordination polyhedra surrounding the lanthanide ions. Color code used: grey for bipyrimidine ligand, green, pink, orange and dark blue for the respective tmhd ligands.

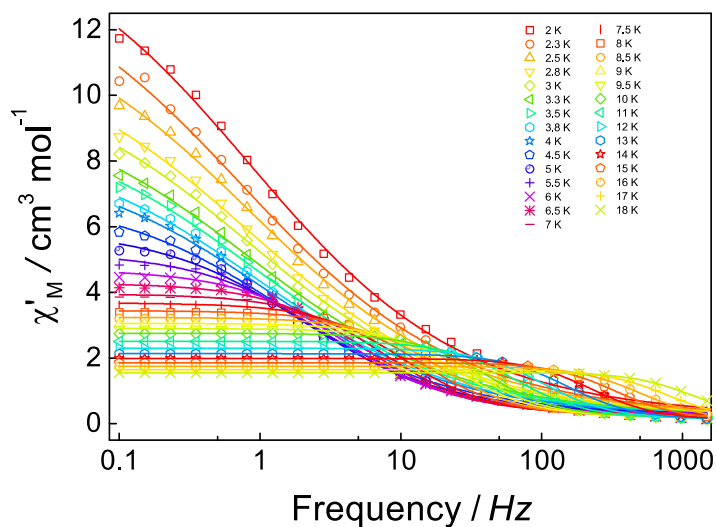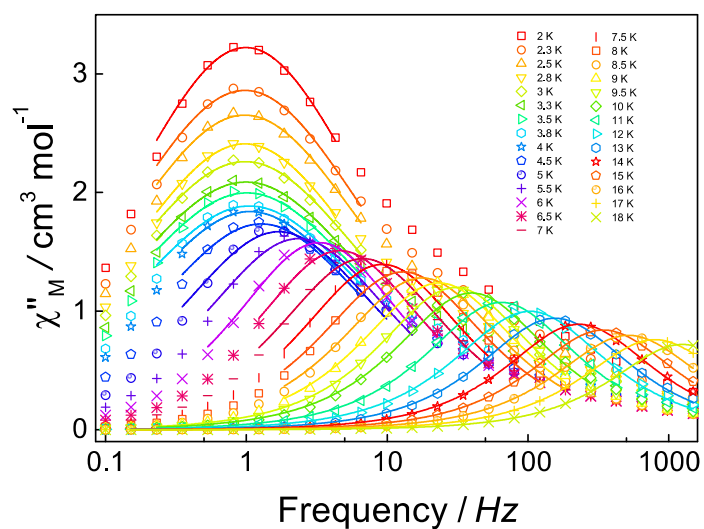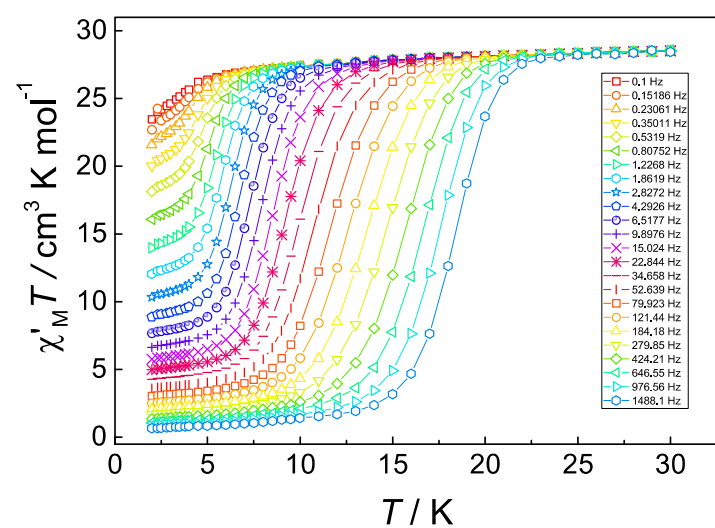

**Figure S2:**  $\chi'_M(\nu)$ ,  $\chi''_M(\nu)$  and  $\chi'_M T(\nu)$  for **3** at zero DC field. Solid lines represent the fittings.

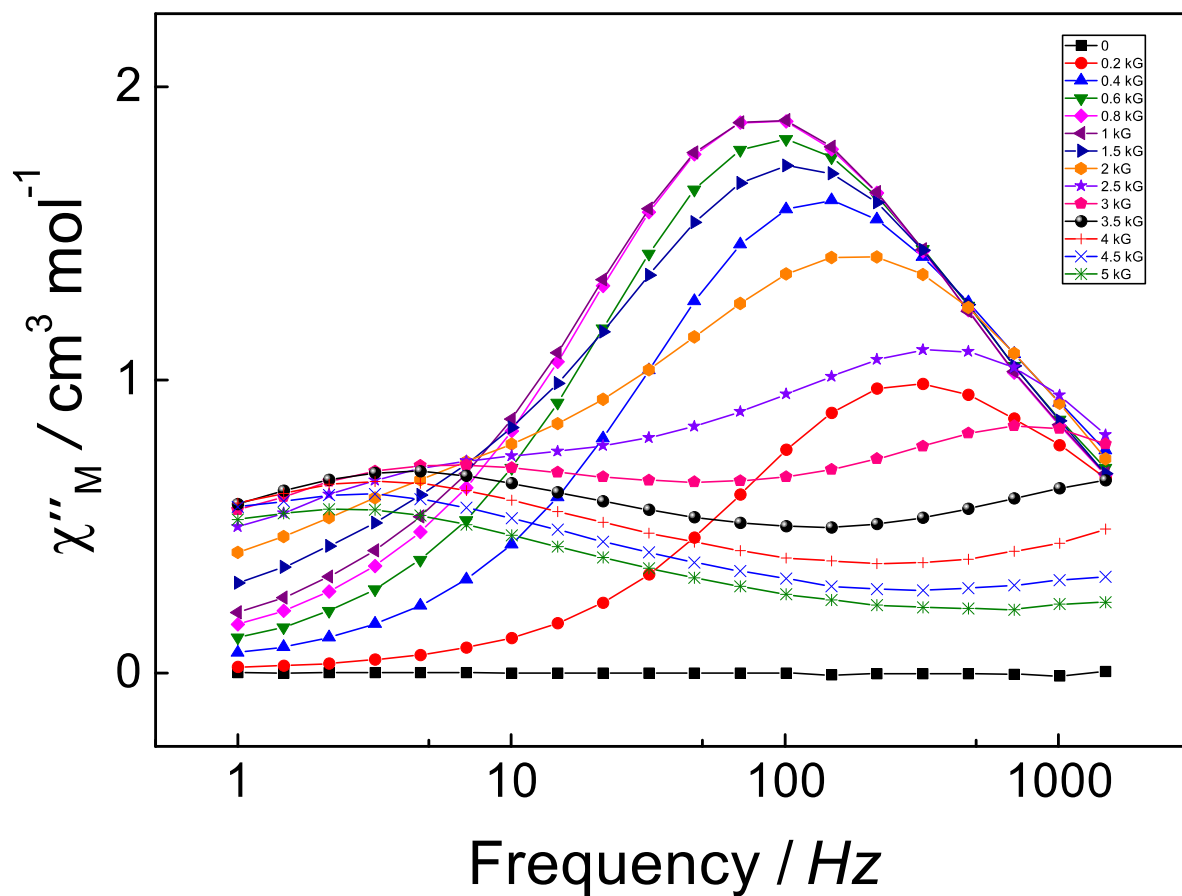

Figure S3:  $\chi''_M(\nu)$  for compound 5 at 2 K from 0 to 5 kG (solid lines are guide for the eye).

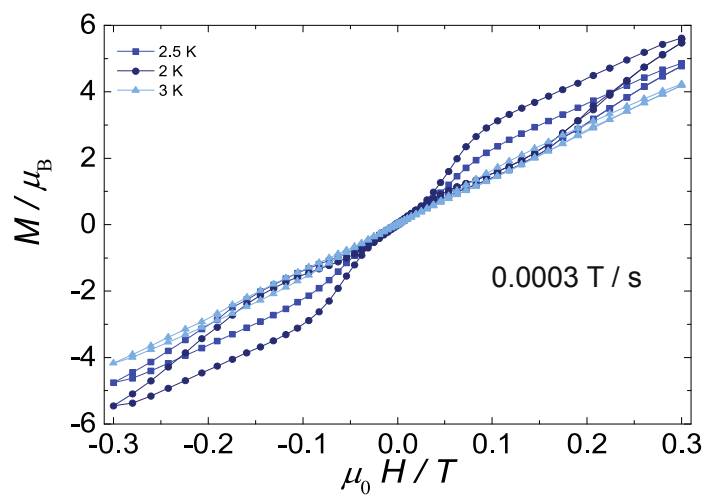

Figure S4: Hysteresis loops observed in the  $M_\beta$  as a function of applied magnetic field ( $H$ ).



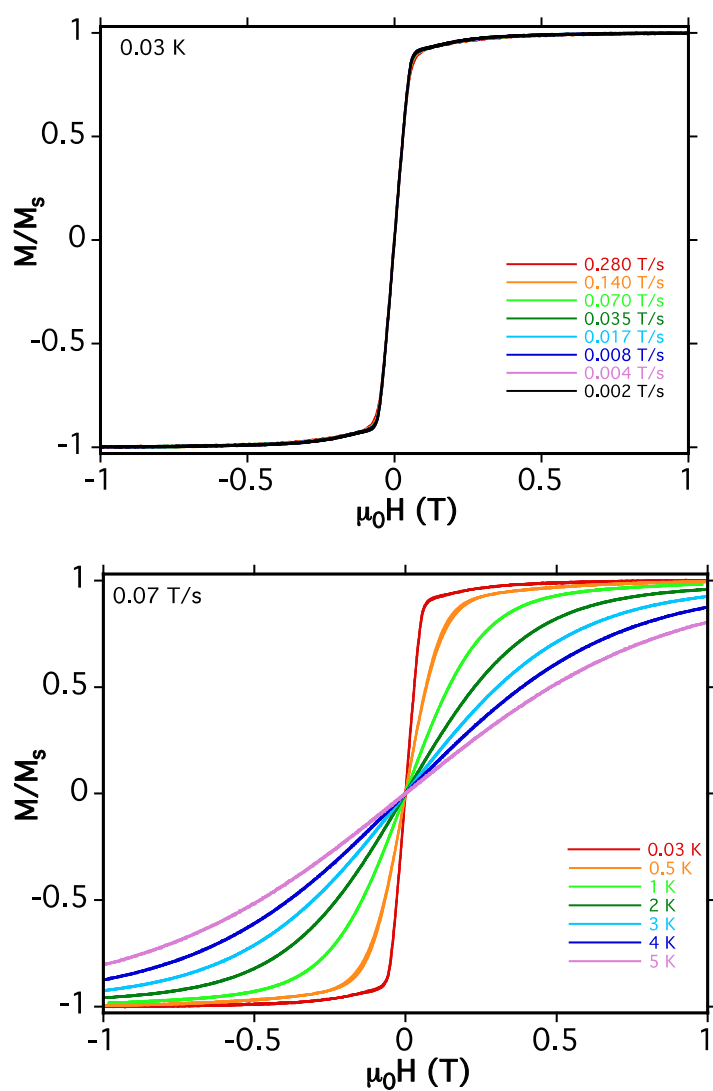

**Figure S5:** Magnetization vs. field on a single crystal of  $Tb_2$  complex 2 at 0.03 K with different field sweep rates (left) and at a 0.07 T/s sweep rate in the 0.03-5 K temperature range.

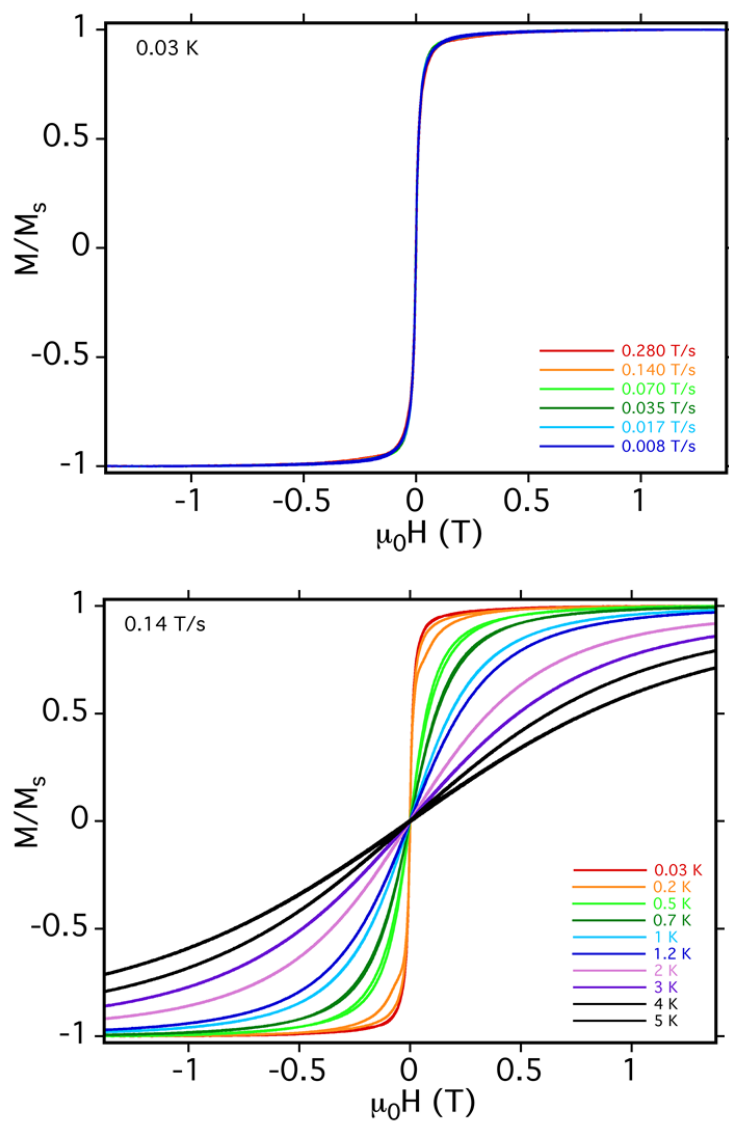

**Figure S6:** Magnetization vs field on a single crystal of  $\text{Er}_2$  complex 5 at 0.03 K with different field sweep rates (left) and at a 0.14 T/s sweep rate in the 0.03–5 K temperature range.
